# Supplementary material
Source: PubMed Central journal article supplement (PMC3280131)

**Top ten similarities to microbial organisms**

| Species                               | No. sequence similarities | % of total SEED similarities | Trophic lifestyle              | Trophic lifestyle (total bacteria + protists)                                        |
|---------------------------------------|---------------------------|------------------------------|--------------------------------|--------------------------------------------------------------------------------------|
| Millennium 19 (Black reef)            |                           |                              |                                |                                                                                      |
| <i>Candidatus Pelagibacter ubique</i> | 2950                      | 19.4                         | chemoheterotrophic bacteria    | 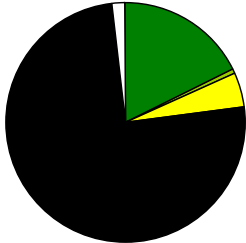   |
| <i>Prochlorococcus marinus</i> subsp. | 1092                      | 7.2                          | photoautotrophic bacteria      |                                                                                      |
| <i>Prochlorococcus marinus</i>        | 1011                      | 6.7                          | photoautotrophic bacteria      |                                                                                      |
| <i>Flavobacteria</i> sp.              | 550                       | 3.6                          | chemoheterotrophic bacteria    |                                                                                      |
| Flavobacteriales bacterium            | 366                       | 2.4                          | chemoheterotrophic bacteria    |                                                                                      |
| <i>Croceibacter atlanticus</i>        | 364                       | 2.4                          | chemoheterotrophic bacteria    |                                                                                      |
| <i>Gramella forsetii</i>              | 358                       | 2.4                          | chemoheterotrophic bacteria    |                                                                                      |
| <i>Flavobacterium</i> sp.             | 307                       | 2.0                          | chemoheterotrophic bacteria    |                                                                                      |
| <i>Cellulophaga</i> sp.               | 287                       | 1.9                          | chemoheterotrophic bacteria    |                                                                                      |
| <i>Acinetobacter baumannii</i>        | 277                       | 1.8                          | chemoheterotrophic bacteria    |                                                                                      |
| Millennium 9                          |                           |                              |                                |                                                                                      |
| <i>Pseudomonas putida</i>             | 207                       | 14.3                         | chemoheterotrophic bacteria    |    |
| <i>Odontella sinensis</i>             | 129                       | 8.9                          | photoautotrophic protist       |                                                                                      |
| <i>Methylophaga thalassica</i>        | 93                        | 6.4                          | chemoheterotrophic bacteria    |                                                                                      |
| <i>Nitrosomonas</i> sp.               | 91                        | 6.3                          | chemolithoautotrophic bacteria |                                                                                      |
| <i>Candidatus Pelagibacter ubique</i> | 71                        | 4.9                          | chemoheterotrophic bacteria    |                                                                                      |
| <i>Acinetobacter baumannii</i>        | 56                        | 3.9                          | chemoheterotrophic bacteria    |                                                                                      |
| <i>Nostoc punctiforme</i>             | 36                        | 2.5                          | photoautotrophic bacteria      |                                                                                      |
| <i>Euglena gracilis</i>               | 27                        | 1.9                          | photoautotrophic protist       |                                                                                      |
| <i>Trichodesmium erythraeum</i>       | 24                        | 1.7                          | photoautotrophic bacteria      |                                                                                      |
| <i>Thermosynechococcus elongatus</i>  | 20                        | 1.4                          | photoautotrophic bacteria      |                                                                                      |
| Flint 2                               |                           |                              |                                |                                                                                      |
| <i>Odontella sinensis</i>             | 411                       | 10.7                         | photoautotrophic protist       |    |
| <i>Guillardia theta</i>               | 185                       | 4.8                          | photoautotrophic protist       |                                                                                      |
| <i>Euglena gracilis</i>               | 129                       | 3.4                          | photoautotrophic protist       |                                                                                      |
| <i>Thermosynechococcus elongatus</i>  | 118                       | 3.1                          | photoautotrophic bacteria      |                                                                                      |
| <i>Trichodesmium erythraeum</i>       | 101                       | 2.6                          | photoautotrophic bacteria      |                                                                                      |
| <i>Gloeobacter violaceus</i>          | 88                        | 2.3                          | photoautotrophic bacteria      |                                                                                      |
| <i>Candidatus Pelagibacter ubique</i> | 85                        | 2.2                          | chemoheterotrophic bacteria    |                                                                                      |
| <i>Nostoc punctiforme</i>             | 80                        | 2.1                          | photoautotrophic bacteria      |                                                                                      |
| <i>Pseudomonas putida</i>             | 79                        | 2.1                          | chemoheterotrophic bacteria    |                                                                                      |
| <i>Cyanophora paradoxa</i>            | 66                        | 1.7                          | photoautotrophic protist       |                                                                                      |
| Flint 5                               |                           |                              |                                |                                                                                      |
| <i>Micrococcus luteus</i>             | 477                       | 21.5                         | chemoheterotrophic bacteria    |   |
| <i>Zymomonas mobilis</i>              | 193                       | 8.7                          | chemoheterotrophic bacteria    |                                                                                      |
| <i>Acidiphilium cryptum</i>           | 191                       | 8.6                          | chemoheterotrophic bacteria    |                                                                                      |
| <i>Odontella sinensis</i>             | 162                       | 7.3                          | photoautotrophic protist       |                                                                                      |
| <i>Bacillus subtilis</i>              | 146                       | 6.6                          | chemoheterotrophic bacteria    |                                                                                      |
| <i>Shigella sonnei</i>                | 83                        | 3.7                          | chemoheterotrophic bacteria    |                                                                                      |
| <i>Microcystis aeruginosa</i>         | 63                        | 2.8                          | photoautotrophic bacteria      |                                                                                      |
| <i>Nostoc punctiforme</i>             | 59                        | 2.7                          | photoautotrophic bacteria      |                                                                                      |
| <i>Acinetobacter baumannii</i>        | 53                        | 2.4                          | chemoheterotrophic bacteria    |                                                                                      |
| <i>Guillardia theta</i>               | 35                        | 1.6                          | photoautotrophic protist       |                                                                                      |
| Starbuck 7                            |                           |                              |                                |                                                                                      |
| <i>Odontella sinensis</i>             | 803                       | 9.4                          | photoautotrophic protist       |  |
| <i>Acinetobacter baumannii</i>        | 506                       | 5.9                          | chemoheterotrophic bacteria    |                                                                                      |
| <i>Candidatus Pelagibacter ubique</i> | 366                       | 4.3                          | chemoheterotrophic bacteria    |                                                                                      |
| <i>Guillardia theta</i>               | 296                       | 3.5                          | photoautotrophic protist       |                                                                                      |
| <i>Thermosynechococcus elongatus</i>  | 244                       | 2.8                          | photoautotrophic bacteria      |                                                                                      |
| <i>Xanthomonas campestris</i>         | 224                       | 2.6                          | chemoheterotrophic bacteria    |                                                                                      |
| <i>Nostoc punctiforme</i>             | 221                       | 2.6                          | photoautotrophic bacteria      |                                                                                      |
| <i>Pseudomonas putida</i>             | 207                       | 2.4                          | chemoheterotrophic bacteria    |                                                                                      |
| <i>Euglena gracilis</i>               | 153                       | 1.8                          | photoautotrophic protist       |                                                                                      |
| <i>Cyanophora paradoxa</i>            | 150                       | 1.7                          | photoautotrophic protist       |                                                                                      |
| Vostok 10                             |                           |                              |                                |                                                                                      |
| <i>Acinetobacter baumannii</i>        | 2599                      | 15.7                         | chemoheterotrophic bacteria    |  |
| <i>Pseudomonas putida</i>             | 2155                      | 13.0                         | chemoheterotrophic bacteria    |                                                                                      |
| <i>Methylophaga thalassica</i>        | 1114                      | 6.7                          | chemoheterotrophic bacteria    |                                                                                      |
| <i>Acinetobacter</i> sp.              | 1095                      | 6.6                          | chemoheterotrophic bacteria    |                                                                                      |
| <i>Nitrosomonas</i> sp.               | 799                       | 4.8                          | chemolithoautotrophic bacteria |                                                                                      |
| <i>Idiomarina loihiensis</i>          | 674                       | 4.1                          | chemoheterotrophic bacteria    |                                                                                      |
| <i>Citrobacter freundii</i>           | 634                       | 3.8                          | chemoheterotrophic bacteria    |                                                                                      |
| <i>Odontella sinensis</i>             | 435                       | 2.6                          | photoautotrophic protist       |                                                                                      |
| <i>Vibrio splendidus</i>              | 387                       | 2.3                          | chemoheterotrophic bacteria    |                                                                                      |
| <i>Campylobacter hominis</i>          | 358                       | 2.2                          | chemoheterotrophic bacteria    |                                                                                      |

No., number. The pie charts include all sequence similarities designated by the SEED database, E-value < 0.00001.

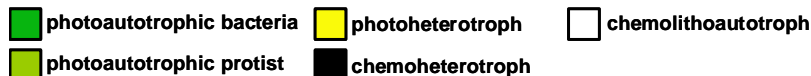

Supplement: ismej2011114x4.pdf [file ismej2011114x4.pdf]
